# Supplementary material for: Extensive hybridization following a large escape of domesticated Atlantic salmon in the Northwest Atlantic
Source: PubMed Central journal article supplement (PMC6123692; doi:10.1038/s42003-018-0112-9), 2018-08-09
Supplement: 42003_2018_112_MOESM1_ESM.pdf [file 42003_2018_112_MOESM1_ESM.pdf]

1 **Supplementary Table 1.** Numbers of young-of-the-year Atlantic salmon sampled in 2014,  
2 and the number of unique families and numbers of parents determined by COLONY for  
3 each river. Note: the sum of the number of wild, farmed and F1 parents may not necessarily  
4 equal the total number of parents. While COLONY was able to identify all unique parents,  
5 unambiguous assignment to hybrid class was not possible for every juvenile salmon  
6 sampled, and the hybrid class of the juveniles were used to infer the origin of their parents  
7 (refer to materials and methods for further clarification).  
8

| River Name          | Sample Size | Number of Families | Total Parents | Number Wild Parents | Number Farm Parents | Number F1 Parents |
|---------------------|-------------|--------------------|---------------|---------------------|---------------------|-------------------|
| Bottom Brook        | 32          | 24                 | 26            | 7                   | 4                   | 7                 |
| Conne River         | 370         | 274                | 268           | 251                 | 2                   | 2                 |
| Dollard's Brook     | 25          | 23                 | 26            | 19                  | 4                   | 0                 |
| Northwest Brook     | 41          | 20                 | 21            | 13                  | 8                   | 0                 |
| Garnish River       | 199         | 156                | 146           | 134                 | 11                  | 1                 |
| Grand Bank Brook    | 42          | 39                 | 40            | 36                  | 0                   | 2                 |
| Grand LaPierre      | 118         | 51                 | 39            | 9                   | 23                  | 5                 |
| Long Harbour River  | 137         | 118                | 98            | 66                  | 20                  | 2                 |
| Salmonier Brook     | 40          | 32                 | 34            | 34                  | 0                   | 0                 |
| Little River        | 130         | 122                | 115           | 105                 | 0                   | 3                 |
| Mal Bay Brook       | 17          | 14                 | 20            | 0                   | 9                   | 9                 |
| Northeast Brook     | 115         | 97                 | 86            | 62                  | 3                   | 8                 |
| Old Bay Brook       | 18          | 16                 | 21            | 11                  | 3                   | 5                 |
| Southeast Brook     | 31          | 24                 | 28            | 14                  | 0                   | 11                |
| Simm's Brook        | 69          | 50                 | 46            | 41                  | 0                   | 5                 |
| Taylor Bay Brook    | 120         | 90                 | 78            | 34                  | 37                  | 1                 |
| Terrenceville Brook | 120         | 93                 | 81            | 6                   | 28                  | 28                |

|                |    |    |    |   |    |    |
|----------------|----|----|----|---|----|----|
| Tailrace Brook | 80 | 66 | 58 | 4 | 12 | 22 |
|----------------|----|----|----|---|----|----|

---

9  
10  
11

12 **Supplementary Table 2.** Numbers of young-of-the-year Atlantic salmon sampled in 2015,  
 13 and the number of unique families and numbers of parents determined by COLONY for  
 14 each river. Note: the sum of the number of wild, farmed and F1 parents may not necessarily  
 15 equal the total number of parents. While COLONY was able to identify all unique parents,  
 16 unambiguous assignment to hybrid class was not possible for every juvenile salmon  
 17 sampled, and the hybrid class of the juveniles were used to infer the origin of their parents  
 18 (refer to materials and methods for further clarification).  
 19  
 20

| River Name         | Sample Size | Number of Families | Total Parents | Number Wild Parents | Number Farm Parents | Number F1 Parents |
|--------------------|-------------|--------------------|---------------|---------------------|---------------------|-------------------|
| Bottom Brook       | -           | -                  | -             | -                   | -                   | -                 |
| Conne River        | 20          | 20                 | 22            | 22                  | 0                   | 0                 |
| Dollard's Brook    | 22          | 22                 | 27            | 21                  | 0                   | 1                 |
| Northwest Brook    | -           | -                  | -             | -                   | -                   | -                 |
| Garnish River      | 56          | 56                 | 40            | 39                  | 0                   | 0                 |
| Grand Bank Brook   | 15          | 15                 | 20            | 20                  | 0                   | 0                 |
| Grand LaPierre     | 14          | 7                  | 9             | 5                   | 4                   | 0                 |
| Long Harbour River | 49          | 39                 | 46            | 38                  | 7                   | 1                 |
| Salmonier Brook    | 89          | 78                 | 63            | 63                  | 0                   | 0                 |
| Little River       | -           | -                  | -             | -                   | -                   | -                 |
| Mal Bay Brook      | 36          | 17                 | 19            | 15                  | 3                   | 0                 |
| Northeast Brook    | -           | -                  | -             | -                   | -                   | -                 |
| Old Bay Brook      | -           | -                  | -             | -                   | -                   | -                 |
| Southeast Brook    | -           | -                  | -             | -                   | -                   | -                 |
| Simm's Brook       | 20          | 19                 | 21            | 21                  | 0                   | 0                 |
| Taylor Bay Brook   | -           | -                  | -             | -                   | -                   | -                 |

|                        |   |   |   |   |   |   |
|------------------------|---|---|---|---|---|---|
| Terrenceville<br>Brook | - | - | - | - | - | - |
| Tailrace Brook         | - | - | - | - | - | - |

---

22 **Supplementary Table 3.** Numbers of 1+ Atlantic salmon sampled in 2015, and the  
 23 number of unique families and numbers of parents determined by COLONY for each  
 24 river. Note: the sum of the number of wild, farmed and F1 parents may not  
 25 necessarily equal the total number of parents. While COLONY was able to identify all  
 26 unique parents, unambiguous assignment to hybrid class was not possible for every  
 27 juvenile salmon sampled, and the hybrid class of the juveniles were used to infer the  
 28 origin of their parents (refer to materials and methods for further clarification).  
 29  
 30

| River Name          | Sample Size | Number of Families | Total Parents | Number Wild Parents | Number Farm Parents | Number F1 Parents |
|---------------------|-------------|--------------------|---------------|---------------------|---------------------|-------------------|
| Bottom Brook        | 33          | 28                 | 30            | 10                  | 2                   | 7                 |
| Conne River         | -           | -                  | -             | -                   | -                   | -                 |
| Dollard's Brook     | 24          | 24                 | 31            | 24                  | 2                   | 1                 |
| Northwest Brook     | -           | -                  | -             | -                   | -                   | -                 |
| Garnish River       | 50          | 44                 | 49            | 47                  | 2                   | 0                 |
| Grand Bank Brook    | 26          | 25                 | 34            | 30                  | 1                   | 0                 |
| Grand LaPierre      | 76          | 41                 | 37            | 5                   | 19                  | 8                 |
| Long Harbour River  | 94          | 90                 | 81            | 58                  | 9                   | 3                 |
| Salmonier Brook     | 22          | 11                 | 21            | 21                  | 0                   | 0                 |
| Little River        | -           | -                  | -             | -                   | -                   | -                 |
| Mal Bay Brook       | 70          | 53                 | 43            | 8                   | 26                  | 5                 |
| Northeast Brook     | 19          | 19                 | 24            | 15                  | 2                   | 2                 |
| Old Bay Brook       | -           | -                  | -             | -                   | -                   | -                 |
| Southeast Brook     | 19          | 19                 | 31            | 12                  | 6                   | 0                 |
| Simm's Brook        | 53          | 45                 | 44            | 38                  | 1                   | 2                 |
| Taylor Bay Brook    | -           | -                  | -             | -                   | -                   | -                 |
| Terrenceville Brook | -           | -                  | -             | -                   | -                   | -                 |
| Tailrace Brook      | 50          | 45                 | 42            | 10                  | 2                   | 16                |

31 **Supplementary Table 4.** Linear model outputs of the impact of relative wild  
 32 salmon population size on the proportions of wild, feral and all hybrid young-of-the-  
 33 year salmon collected from rivers in 2014. F-stat is the F-statistic and D.F. are the  
 34 degrees of freedom  
 35

| Independent Variable | Dependent Variable | Multiple R <sup>2</sup> | Slope (Std. Err.)   | Intercept (Std. Err.) | F-stat; D.F.   | p-value |
|----------------------|--------------------|-------------------------|---------------------|-----------------------|----------------|---------|
| Ln Angling           | Proportion Wild    | 0.5558                  | 0.1712<br>(0.0510)  | -0.0256<br>(0.2055)   | 11.26;<br>1,9  | < 0.01  |
| Ln Angling           | Proportion Feral   | 0.2307                  | -0.0516<br>(0.0314) | 0.3011<br>(0.1266)    | 2.70;<br>1,9   | 0.13    |
| Ln Angling           | Proportion Hybrid  | 0.4588                  | -0.1200<br>(0.0433) | 0.7245<br>(0.1744)    | 7.63;<br>1,9   | < 0.05  |
| Ln Axial Distance    | Proportion Wild    | 0.2355                  | 0.2604<br>(0.1173)  | -0.2680<br>(0.3489)   | 4.93;<br>1,16  | < 0.05  |
| Ln Axial Distance    | Proportion Feral   | 0.0267                  | -0.0464<br>(0.0700) | 0.2981<br>(0.2082)    | 0.44; 1,<br>16 | 0.51    |
| Ln Axial Distance    | Proportion Hybrid  | 0.2973                  | -0.2141<br>(0.0823) | 0.9610<br>(0.2447)    | 6.77;<br>1,16  | < 0.05  |

36  
 37

38 **Supplementary Table 5.** Negative exponential model outputs of the relationship  
 39 between the distance from the 2013 escape event and river mouths on the  
 40 proportions of wild, feral and all hybrid young-of-the-year salmon collected from  
 41 rivers in 2014. D.F. are the degrees of freedom  
 42

| Independent Variable          | Dependent Variable | R <sup>2</sup> | Slope (Std. Err.) | Intercept (Std. Err.) | T value; D.F. | p-value |
|-------------------------------|--------------------|----------------|-------------------|-----------------------|---------------|---------|
| Distance to Escape Event (km) | Proportion Wild    | 0.0576         | 27.42 (23.93)     | -1.10 (0.43)          | 1.10; 16      | 0.28    |
| Distance to Escape Event (km) | Proportion Feral   | 0.1247         | -80.03 (81.33)    | -0.91 (0.77)          | -0.98; 16     | 0.34    |
| Distance to Escape Event (km) | Proportion Hybrid  | 0.0047         | -10.40 (31.79)    | -0.92 (0.43)          | -0.33; 16     | 0.74    |

43 **Supplementary Table 6.** Sample sizes within the populations that made up the wild and  
 44 farmed baselines. Whether the population is wild or farmed is noted, and for wild  
 45 populations the location of the river is given.  
 46

| River Name         | Abbreviation | Sample Size | Wild/Farmed | Latitude (°N) | Longitude (°W) |
|--------------------|--------------|-------------|-------------|---------------|----------------|
| Bay Du Nord River  | BDN          | 52          | Wild        | 47.71232      | 55.41702       |
| Conne River        | CNR          | 44          | Wild        | 47.866        | 55.765         |
| Dollard's Brook    | DLR          | 30          | Wild        | 47.738        | 56.586         |
| Garnish River      | CNR          | 30          | Wild        | 47.228        | 55.347         |
| Grey River         | GRR          | 17          | Wild        | 47.692        | 57.004         |
| Long Harbour River | LHR          | 38          | Wild        | 47.780        | 54.948         |
| LaPoile River      | LPR          | 20          | Wild        | 47.79996      | 58.32075       |
| Old Bay Brook      | OBB          | 29          | Wild        | 47.578        | 55.590         |
| Domestic Sample 1  | DS1          | 117         | Farmed      |               |                |
| Domestic Sample 2  | DS2          | 39          | Farmed      |               |                |

47  
 48



49 **Supplementary Table 7.** Genetic differentiation between baseline samples of Atlantic  
50 salmon from southern Newfoundland using 95 SNPs.  $F_{ST}$  above diagonal, p-value below  
51 diagonal. DS1 and DS2 represent samples of aquaculture salmon.  
52

|     | DS1   | BDN   | CAN   | DLR   | GAR   | GRR   | LHR   | LPR   | OBB   | DS2   |
|-----|-------|-------|-------|-------|-------|-------|-------|-------|-------|-------|
| DS1 | --    | 0.221 | 0.331 | 0.222 | 0.298 | 0.231 | 0.299 | 0.253 | 0.247 | 0.127 |
| BDN | 0.001 | --    | 0.061 | 0.047 | 0.077 | 0.041 | 0.036 | 0.058 | 0.044 | 0.266 |
| CAN | 0.001 | 0.001 | --    | 0.105 | 0.159 | 0.115 | 0.063 | 0.099 | 0.117 | 0.358 |
| DLR | 0.001 | 0.001 | 0.001 | --    | 0.068 | 0.004 | 0.055 | 0.109 | 0.033 | 0.291 |
| GAR | 0.001 | 0.001 | 0.001 | 0.001 | --    | 0.061 | 0.085 | 0.149 | 0.061 | 0.354 |
| GRR | 0.001 | 0.001 | 0.001 | 0.183 | 0.001 | --    | 0.059 | 0.125 | 0.030 | 0.321 |
| LHR | 0.001 | 0.001 | 0.001 | 0.001 | 0.001 | 0.001 | --    | 0.106 | 0.054 | 0.345 |
| LPR | 0.001 | 0.001 | 0.001 | 0.001 | 0.001 | 0.001 | 0.001 | --    | 0.114 | 0.234 |
| OBB | 0.001 | 0.001 | 0.001 | 0.001 | 0.001 | 0.001 | 0.001 | 0.001 | --    | 0.310 |
| DS2 | 0.001 | 0.001 | 0.001 | 0.001 | 0.001 | 0.001 | 0.001 | 0.001 | 0.001 | --    |

53  
54

55 **Supplementary Table 8.** Proportions of individuals assigned to hybrid classes at a  
 56 posterior probability of assignment of 0.8 for YoY individuals captured in 2014.  
 57

| River | Feral | Wild  | F1    | F2    | BC Wild | BC Farm | Unassigned |
|-------|-------|-------|-------|-------|---------|---------|------------|
| BTB   | 0.344 | 0.188 | 0.000 | 0.219 | 0.000   | 0.000   | 0.250      |
| CNR   | 0.008 | 0.908 | 0.016 | 0.005 | 0.000   | 0.008   | 0.054      |
| DLR   | 0.160 | 0.640 | 0.000 | 0.000 | 0.000   | 0.000   | 0.200      |
| FBN   | 0.073 | 0.049 | 0.854 | 0.000 | 0.000   | 0.000   | 0.024      |
| GAR   | 0.030 | 0.638 | 0.317 | 0.000 | 0.000   | 0.005   | 0.010      |
| GBB   | 0.000 | 0.762 | 0.000 | 0.000 | 0.000   | 0.119   | 0.119      |
| GLP   | 0.415 | 0.000 | 0.347 | 0.000 | 0.127   | 0.000   | 0.110      |
| LHR   | 0.095 | 0.482 | 0.248 | 0.000 | 0.022   | 0.015   | 0.139      |
| LMS   | 0.000 | 1.000 | 0.000 | 0.000 | 0.000   | 0.000   | 0.000      |
| LTR   | 0.000 | 0.823 | 0.000 | 0.015 | 0.000   | 0.062   | 0.100      |
| MAL   | 0.529 | 0.000 | 0.000 | 0.353 | 0.000   | 0.000   | 0.118      |
| NEB   | 0.035 | 0.591 | 0.000 | 0.000 | 0.000   | 0.113   | 0.261      |
| OBB   | 0.056 | 0.389 | 0.111 | 0.167 | 0.056   | 0.000   | 0.222      |
| SEB   | 0.000 | 0.323 | 0.000 | 0.258 | 0.000   | 0.194   | 0.258      |
| SMB   | 0.000 | 0.826 | 0.000 | 0.029 | 0.000   | 0.058   | 0.087      |
| TBB   | 0.250 | 0.008 | 0.642 | 0.000 | 0.017   | 0.000   | 0.083      |
| TEB   | 0.358 | 0.033 | 0.075 | 0.108 | 0.117   | 0.000   | 0.308      |
| TRB   | 0.050 | 0.013 | 0.125 | 0.075 | 0.263   | 0.000   | 0.475      |

58  
 59

60 **Supplementary Table 9.** Proportions of individuals assigned to hybrid classes at a  
 61 posterior probability of assignment of 0.8 for YoY captured in 2015.  
 62

| River | Feral | Wild  | F1    | F2    | BC Wild | BC Farm | Unassigned |
|-------|-------|-------|-------|-------|---------|---------|------------|
| BTB   | 0.061 | 0.091 | 0.030 | 0.000 | 0.000   | 0.394   | 0.424      |
| DLR   | 0.042 | 0.667 | 0.000 | 0.000 | 0.000   | 0.125   | 0.167      |
| FBN   | 0.000 | 0.091 | 0.364 | 0.000 | 0.000   | 0.000   | 0.545      |
| GAR   | 0.000 | 0.860 | 0.080 | 0.000 | 0.000   | 0.000   | 0.060      |
| GBB   | 0.000 | 0.769 | 0.115 | 0.000 | 0.000   | 0.000   | 0.115      |
| GLP   | 0.171 | 0.000 | 0.513 | 0.000 | 0.118   | 0.000   | 0.197      |
| LHR   | 0.074 | 0.585 | 0.181 | 0.000 | 0.021   | 0.011   | 0.128      |
| LMS   | 0.000 | 1.000 | 0.000 | 0.000 | 0.000   | 0.000   | 0.000      |
| MAL   | 0.443 | 0.000 | 0.143 | 0.000 | 0.057   | 0.029   | 0.329      |
| NEB   | 0.000 | 0.368 | 0.105 | 0.000 | 0.000   | 0.211   | 0.316      |
| SEB   | 0.000 | 0.158 | 0.000 | 0.000 | 0.000   | 0.368   | 0.474      |
| SMB   | 0.000 | 0.830 | 0.000 | 0.000 | 0.019   | 0.038   | 0.113      |
| TRB   | 0.000 | 0.000 | 0.000 | 0.220 | 0.120   | 0.340   | 0.320      |

63  
 64

65 **Supplementary Table 10.** Proportions of individuals assigned to hybrid classes at a  
 66 posterior probability of assignment of 0.8 for 1+ individuals captured in 2015  
 67

| River | Feral | Wild  | F1    | F2    | BC Wild | BC Farm | Unassigned |
|-------|-------|-------|-------|-------|---------|---------|------------|
| BTB   | 0.000 | 0.333 | 0.000 | 0.000 | 0.000   | 0.667   | 0.000      |
| DLR   | 0.000 | 0.727 | 0.000 | 0.000 | 0.000   | 0.091   | 0.182      |
| FBN   |       |       |       |       |         |         |            |
| GAR   | 0.000 | 0.929 | 0.000 | 0.000 | 0.000   | 0.000   | 0.071      |
| GBB   | 0.000 | 1.000 | 0.000 | 0.000 | 0.000   | 0.000   | 0.000      |
| GLP   | 0.000 | 0.000 | 0.786 | 0.000 | 0.000   | 0.000   | 0.214      |
| LAM   | 0.000 | 1.000 | 0.000 | 0.000 | 0.000   | 0.000   | 0.000      |
| LHR   | 0.122 | 0.429 | 0.265 | 0.000 | 0.041   | 0.000   | 0.143      |
| MAL   | 0.000 | 0.000 | 0.000 | 0.028 | 0.000   | 0.778   | 0.194      |
| NEB   | 0.000 | 0.000 | 0.000 | 0.000 | 0.000   | 1.000   | 0.000      |
| SEB   |       |       |       |       |         |         |            |
| SMB   | 0.000 | 0.950 | 0.000 | 0.000 | 0.000   | 0.000   | 0.050      |
| TRB   | 0.000 | 0.000 | 0.000 | 0.444 | 0.000   | 0.000   | 0.556      |

68  
 69

70 **Supplementary Table 11.** Identities and locations of the 10 rivers used in the calculation  
71 of the relationship between river size (i.e. axial distance; the distance along a straight line  
72 along the longest axis of the river) and Atlantic salmon population size. The average number  
73 of salmon harvested per year (Avg. Harvested/Yr) and the average number of salmon  
74 detected at Fisheries and Oceans Canada counting fences (Avg. Count/Yr) during the period  
75 2009-2014 were used as proxies of population size. Data for axial distance is from Porter,  
76 et al. <sup>1</sup>, for counts is from DFO <sup>2</sup> and harvest statistics is from DFO <sup>3</sup>.  
77

| River             | Avg. Harvested/Yr | Avg. Count/Year | Axial Distance | Latitude (°N) | Longitude (°W) |
|-------------------|-------------------|-----------------|----------------|---------------|----------------|
| Campbellton River | 559.0             | 4633.4          | 40.2           | 49.28         | 54.92          |
| Conne River       | 370.8             | 1919.4          | 45.2           | 47.91         | 55.70          |
| Exploits River    | 9362.2            | 36544.6         | 237.2          | 49.03         | 55.41          |
| Gander River      | 3952.2            | 25733.3         | 156.7          | 49.26         | 54.49          |
| Harry's River     | 1010.8            | 3319.4          | 58.6           | 48.51         | 58.42          |
| Middle Brook      | 612.6             | 3105.2          | 41.8           | 48.24         | 58.83          |
| Northwest River   | 45.8              | 1181.0          | 60.0           | 55.393        | 47.72          |
| Rocky River       | 3.0               | 578.4           | 37.0           | 47.22         | 53.57          |
| Terra Nova River  | 710.4             | 4492.2          | 105.4          | 48.67         | 54.00          |
| Torrent River     | 730.8             | 4562.0          | 38.6           | 50.61         | 57.15          |

78

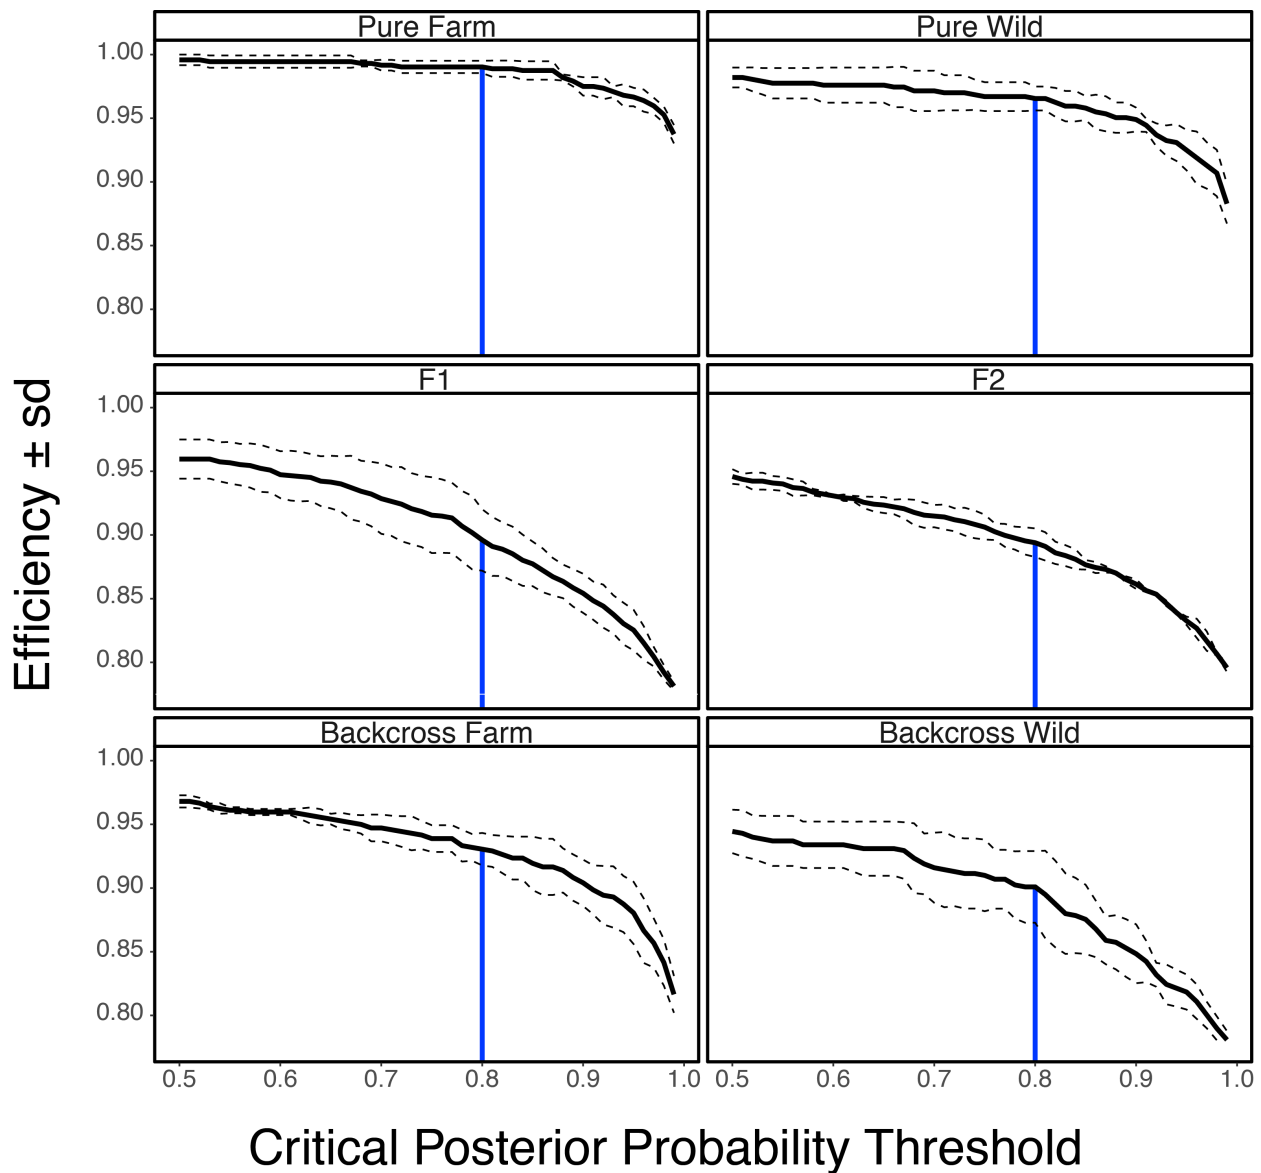

79  
80  
81  
82  
83  
84  
85

**Supplementary Figure 1.** Efficiency of detection of each of the genotype frequency classes across a range of critical posterior probability thresholds for the 95 SNP panel used in this study. The black line represents the mean of three replicate analyses of each of three independently simulated datasets and the dotted lines are the standard deviation. The vertical blue line is meant to highlight the critical posterior probability of assignment threshold ( $> 0.8$ ) used in this study.

86

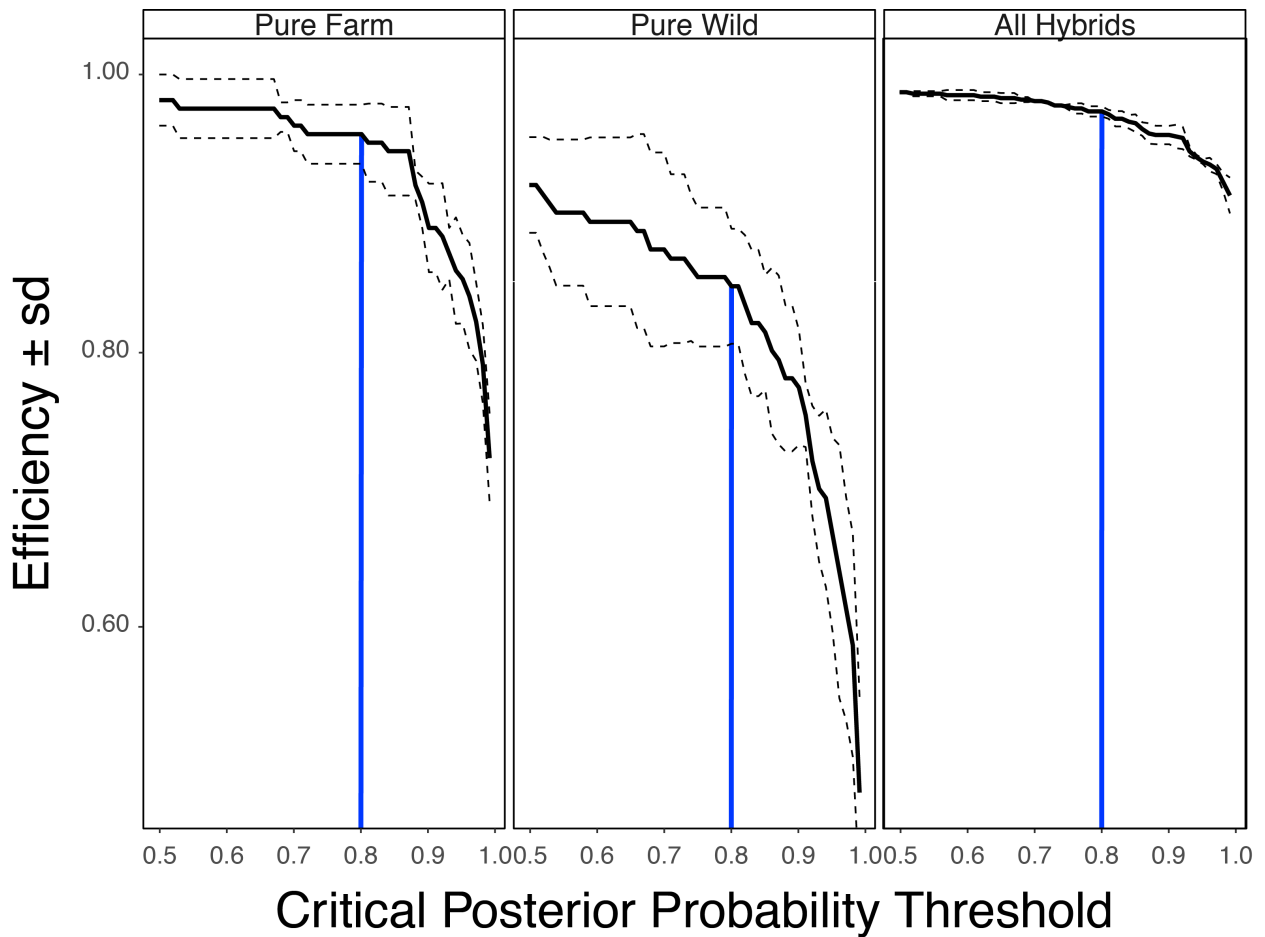

87

88 **Supplementary Figure 2.** Efficiency of detection of the pure genotype frequency classes, and  
89 all hybrid genotype frequency classes combined across a range of critical posterior probability  
90 thresholds for the 95 SNP panel used in this study. The black line represents the mean of three  
91 replicate analyses of each of three independently simulated datasets and the dotted lines are the  
92 standard deviation. The vertical blue line is meant to highlight the critical posterior probability of  
93 assignment threshold ( $> 0.8$ ) used in this study.

94

95

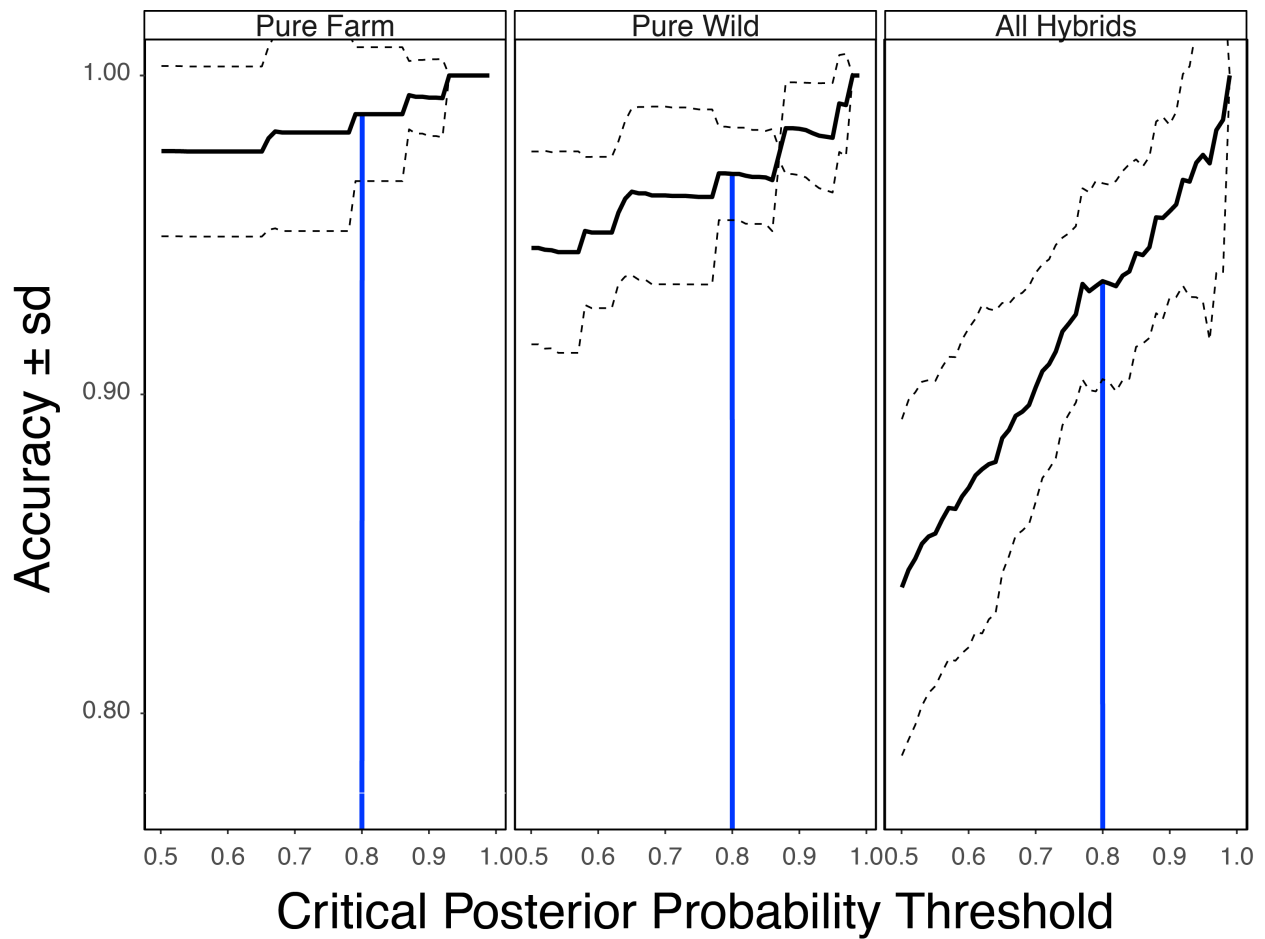

96

97

98 **Supplementary Figure 3.** Accuracy of detection of the pure genotype frequency classes, and all  
 99 hybrid genotype frequency classes combined across a range of critical posterior probability  
 100 thresholds for the 95 SNP panel used in this study. The black line represents the mean of three  
 101 replicate analyses of each of three independently simulated datasets and the dotted lines are the  
 102 standard deviation. The vertical blue line is meant to highlight the critical posterior probability of  
 103 assignment threshold ( $> 0.8$ ) used in this study.

104



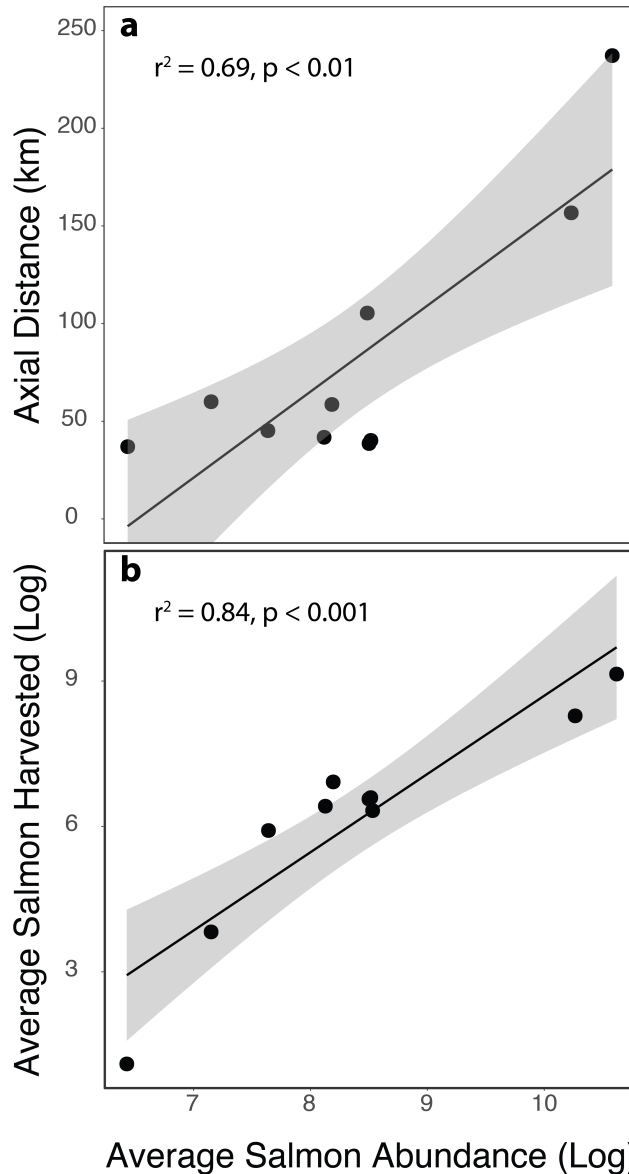

105

106 **Supplementary Figure 4. a** Relationship between river size (axial distance, the distance  
 107 along a straight line along the longest axis of the river, in km) and the mean number of  
 108 returning Atlantic salmon detected at Fisheries and Oceans Canada counting fences on the  
 109 Island of Newfoundland for the period of 2010 to 2014. **b** Relationship between the mean  
 110 number of salmon caught by recreational anglers and the mean number of Atlantic salmon  
 111 detected at Fisheries and Oceans Canada counting fences on the Island of Newfoundland  
 112 for the period of 2010 to 2014. For panel a, the F-statistic was 18.18 on 1, and 8 degrees of  
 113 freedom, with an intercept of 7.0141 ( $\pm$  0.3830), and slope 0.0158 ( $\pm$  0.0037). For panel b,  
 114 the F-statistic was 40.47 on 1 and 8 degrees of freedom, with an intercept -7.4513 ( $\pm$   
 115 2.153), and a slope 1.632 ( $\pm$  0.2565).  
 116

117 **Supplementary References**

118

- 119 1 Porter, T. R., Riche, L. G. & Traverse, G. R. Catalogue of Rivers in Insular  
120 Newfoundland. Volume B. 287 (Environment Canada, Fisheries and Marine Service,  
121 Resource Development Branch, Newfoundland Region, 1974).
- 122 2 DFO. Atlantic Salmon (*Salmo salar*) Stock Status Update in Newfoundland and Labrador  
123 for 2014. DFO Canadian Science Advisory Secretariat Science Response 2015/023.  
124 (2015).
- 125 3 DFO. Stock Assessment of Newfoundland and Labrador Atlantic Salmon – 2016. DFO  
126 Can. Sci. Advis. Sec. Sci. Advis. Rep. 2017/035. . (2017).

127
